# Supplementary material for: Feeding practices and risk factors for chronic infant undernutrition among refugees and migrants along the Thailand-Myanmar border: a mixed-methods study
Source: Springer Nature journal article supplement (doi:10.1186/s12889-019-7825-7), 2019-11-28
Supplement: MOESM1 [file 17445768]

**Additional file 3: Focus group discussion guide for “Feeding practices and risk factors for chronic infant undernutrition among refugees and migrants along the Thailand-Myanmar border: a mixed-methods study”.**

1. What is malnutrition?
  - a. Who is affected?
  - b. *Probe: Can pregnant women have this problem? What can happen?*
2. Have you heard of overnutrition or overweight? What is it?
  - a. Who is affected? How?
  - b. *Probe: Can this be a problem for children? What can happen?*
3. During pregnancy, what are the good foods to eat?
  - a. How much should you eat every day? Does this change as you get closer to delivery? After delivery? How? Why?

*Now, I'd like to ask you some questions about how to feed your baby.*

4. What is the best way to feed your baby after delivery?
  - a. Why?
  - b. *Probe: Is it OK to feed water? When? Why?*
5. When should you start feeding the baby soft foods or rice?
  - a. *Probe: if you get answers before 6 months: why? Where did you learn this?*
6. What are the good foods to feed baby?
  - a. Why? *Probe: does anyone have other ideas? Where did you learn this?*
  - b. *Probe if you get answers like fruit: why?*
  - c. *Probe: what about feeding other foods like meat, egg, fruits, vegetables? When should baby start eating these foods?*
7. How do you prepare soft foods or rice for your baby?
  - a. What are the difficulties in feeding the baby when you start feed foods?
    - i. *Probe: preparing the food—making it soft and easy for baby to eat?*
    - ii. *Probe: time it takes to prepare food?*
    - iii. *Probe: baby doesn't want to eat? Baby takes too long to feed?*
  - b. How do you prepare foods for the baby?
    - i. *Probe: what are the best ways to make the food soft so baby can eat easy?*
8. How much should you feed baby? How many meals should you give baby every day?
  - a. *Probe: when you start feeding soft food or rice?*
  - b. *Probe: Does this change when the baby gets older, like at 6 months or 12 months? Why? How?*

*End the session with counseling on feeding during pregnancy and for the child.*
