# Supplementary material for: Feeding practices and risk factors for chronic infant undernutrition among refugees and migrants along the Thailand-Myanmar border: a mixed-methods study
Source: Springer Nature journal article supplement (doi:10.1186/s12889-019-7825-7), 2019-11-28
Supplement: MOESM2 [file 17445768]

**Table S1. Maternal and infant variables of interest from cross-sectional survey and regression analysis.**

| Variables of interest                 | Stunting<br>(n=70) | Normal<br>(n=320) | Underweight<br>(n=58) | Normal<br>(n=332) | Univariable (p-value) |             | Adjusted OR, (95% CI); p-value |                              |  |
|---------------------------------------|--------------------|-------------------|-----------------------|-------------------|-----------------------|-------------|--------------------------------|------------------------------|--|
|                                       |                    |                   |                       |                   | Stunting              | Underweight | Stunting                       | Underweight                  |  |
| <b>Maternal<sup>a</sup></b>           |                    |                   |                       |                   |                       |             |                                |                              |  |
| Age (yrs), mean (SD)                  | 27.3 (6.8)         | 27.0 (6.3)        | 28.6 (7.3)            | 26.7 (6.2)        | 0.707                 | 0.036       | 1.01, (0.97, 1.06);<br>0.602   | 1.06, (1.01, 1.10);<br>0.019 |  |
| Ethnicity, n (%)                      |                    |                   |                       |                   |                       |             |                                |                              |  |
| Karen                                 | 47 (18.5)          | 207 (72.1)        | 35 (13.8)             | 219 (86.2)        | 0.401                 | 0.612       | Not included                   | Not included                 |  |
| Burman                                | 17 (14.9)          | 97 (85.1)         | 18 (15.8)             | 96 (84.2)         |                       |             |                                |                              |  |
| Religion, n (%)                       |                    |                   |                       |                   |                       |             |                                |                              |  |
| Buddhist                              | 55 (19.0)          | 235 (81.0)        | 48 (16.6)             | 242 (83.5)        | 0.283                 | 0.102       | Not included                   | Not included                 |  |
| Christian                             | 11 (14.1)          | 67 (85.9)         | 9 (11.5)              | 69 (88.5)         |                       |             |                                |                              |  |
| Muslim                                | 3 (14.3)           | 18 (85.7)         | 1 (4.76)              | 20 (95.2)         |                       |             |                                |                              |  |
| Status, n (%)                         |                    |                   |                       |                   |                       |             |                                |                              |  |
| Refugee (Referent)                    | 21 (12.7)          | 144 (87.3)        | 16 (9.7)              | 149 (90.3)        | 0.021                 | 0.014       | 2.08, (1.12, 3.84);<br>0.020   | 2.26, (1.17, 4.36);<br>0.015 |  |
| Migrant                               | 49 (21.8)          | 176 (78.2)        | 42 (18.7)             | 183 (81.3)        |                       |             |                                |                              |  |
| Gravidity, n (%)                      |                    |                   |                       |                   |                       |             |                                |                              |  |
| Primigravida                          | 18 (14.2)          | 109 (85.8)        | 15 (11.8)             | 112 (88.2)        | 0.177                 | 0.238       | Not included                   | Not included                 |  |
| Multigravida                          | 52 (19.8)          | 211 (80.2)        | 43 (16.4)             | 220 (83.7)        |                       |             |                                |                              |  |
| Height (cm), mean (SD) <sup>b</sup>   | 148.0 (5.2)        | 151.6 (5.2)       | 149.1 (5.7)           | 151.3 (5.2)       | <0.001                | 0.003       | 0.50, (0.38, 0.66);<br><0.001  | 0.64, (0.48, 0.85);<br>0.002 |  |
| BMI, n (%) <sup>c</sup>               |                    |                   |                       |                   |                       |             |                                |                              |  |
| Low (< 18.5 kg/m <sup>2</sup> )       | 10 (17.0)          | 49 (83.1)         | 11 (18.6)             | 48 (81.4)         | 0.974                 | 0.434       | Not included                   | Not included                 |  |
| Normal (18.5-22.9 kg/m <sup>2</sup> ) | 27 (15.7)          | 145 (84.3)        | 24 (14.0)             | 148 (86.0)        |                       |             |                                |                              |  |
| High (≥ 23 kg/m <sup>2</sup> )        | 12 (16.2)          | 62 (83.8)         | 8 (10.8)              | 66 (89.2)         |                       |             |                                |                              |  |
| GWG, n (%) <sup>d</sup>               |                    |                   |                       |                   |                       |             |                                |                              |  |
| < 10 kg                               | 29 (21.0)          | 109 (79.0)        | 24 (17.4)             | 114 (82.6)        | 0.018                 | 0.041       | Not included                   | Not included                 |  |
| 10-15 kg                              | 19 (14.8)          | 109 (85.2)        | 18 (14.1)             | 110 (85.9)        |                       |             |                                |                              |  |
| ≥ 15 kg                               | 2 (5.0)            | 38 (95.0)         | 1 (2.5)               | 39 (97.5)         |                       |             |                                |                              |  |
| Malaria in pregnancy, n (%)           |                    |                   |                       |                   |                       |             |                                |                              |  |
| Yes                                   | 12 (34.3)          | 23 (65.7)         | 10 (28.6)             | 25 (71.4)         | 0.008                 | 0.017       | 1.88, (0.79, 4.45);<br>0.151   | 1.91, (0.80, 4.57);<br>0.145 |  |
| No (Referent)                         | 58 (16.3)          | 297 (83.7)        | 48 (13.5)             | 307 (86.5)        |                       |             |                                |                              |  |
| Anemia, n (%)                         |                    |                   |                       |                   |                       |             |                                |                              |  |
| Yes                                   | 16 (19.5)          | 66 (80.5)         | 10 (12.2)             | 72 (87.8)         | 0.678                 | 0.443       | Not included                   | Not included                 |  |
| No                                    | 54 (17.5)          | 254 (82.5)        | 48 (15.6)             | 260 (84.4)        |                       |             |                                |                              |  |
| Literacy, n (%)                       |                    |                   |                       |                   |                       |             |                                |                              |  |
| Can read/write                        | 41 (15.6)          | 222 (84.4)        | 33 (12.6)             | 230 (87.5)        | 0.081                 | 0.063       | 0.98, (0.52, 1.85);<br>0.961   | 0.87, (0.47, 1.62);<br>0.668 |  |
| Cannot read/write (Referent)          | 29 (22.8)          | 98 (77.2)         | 25 (19.7)             | 102 (80.3)        |                       |             |                                |                              |  |
| Smoker, n (%)                         |                    |                   |                       |                   |                       |             |                                |                              |  |
| Yes                                   | 11 (31.4)          | 24 (68.6)         | 7 (20.0)              | 28 (80.0)         | 0.029                 | 0.371       | 1.80, (0.70, 4.62);            | Not included                 |  |



| Variables of interest                   | Stunting<br>(n=70) | Normal<br>(n=320) | Underweight<br>(n=58) | Normal<br>(n=332) | Univariable (p-value) |             | Adjusted OR, (95% CI); p-value |              |
|-----------------------------------------|--------------------|-------------------|-----------------------|-------------------|-----------------------|-------------|--------------------------------|--------------|
|                                         |                    |                   |                       |                   | Stunting              | Underweight | Stunting                       | Underweight  |
| Yes                                     | 3 (16.7)           | 15 (83.3)         | 4 (22.2)              | 14 (77.8)         | 1.00                  | 0.500       | Not included                   | Not included |
| No                                      | 43 (17.9)          | 197 (82.1)        | 37 (15.4)             | 203 (84.6)        |                       |             |                                |              |
| Any protein fed, n (%)                  |                    |                   |                       |                   |                       |             |                                |              |
| Yes                                     | 18 (19.8)          | 73 (80.2)         | 17 (18.7)             | 74 (81.3)         | 0.465                 | 0.366       | Not included                   | Not included |
| No                                      | 27 (16.2)          | 140 (83.8)        | 24 (14.4)             | 143 (85.6)        |                       |             |                                |              |
| Handwashing, n (%) <sup>c</sup>         |                    |                   |                       |                   |                       |             |                                |              |
| Yes                                     | 43 (14.7)          | 249 (85.3)        | 37 (12.7)             | 255 (87.3)        | 0.025                 | 0.051       | Not included                   | Not included |
| No (Referent)                           | 19 (25.7)          | 55 (74.3)         | 16 (21.6)             | 58 (78.4)         |                       |             |                                |              |
| Safe stool disposal, n (%) <sup>c</sup> |                    |                   |                       |                   |                       |             |                                |              |
| Yes (Referent)                          | 25 (16.3)          | 128 (83.7)        | 15 (9.8)              | 138 (90.2)        | 0.806                 | 0.044       | Not included                   | Not included |
| No                                      | 35 (17.3)          | 167 (82.7)        | 35 (17.3)             | 167 (82.7)        |                       |             |                                |              |

A total of 4 multivariable regression models were created: 1 model tested “maternal risk factors” and infant feeding and WASH behavioral factors and 1 model tested “infant risk factors”, with both models tested for association with stunting and underweight.

<sup>a</sup>Total number of observations included in multivariable regression for “maternal risk factors” for stunting (n=389) and underweight (n=381). Adjusted for maternal age.

<sup>b</sup>Unit of 5 cm used for multivariable regression.

<sup>c</sup>Included only those women with BMI measurement from first trimester (<14 weeks’ gestation), with low BMI (n=59), normal BMI (n=172), and high BMI (n=74), following WHO Asian BMI categories.<sup>32</sup>

<sup>d</sup>Significant for trend. Included only those women with first weight measurement in first trimester (<14 weeks’ gestation, n=306). Excluded from multivariable regression for “maternal risk factors” due to limitation of sample size.

<sup>e</sup>Excluded from multivariable regression analysis for “maternal risk factors” due to collinearity with status (refugee or migrant).

<sup>f</sup>Total number of observations included in multivariable regression for “infant risk factors” for stunting and underweight (n=381). Adjusted for length of gestation, infant sex and infant age.

<sup>g</sup>Excluded from multivariable regression analysis for “infant risk factors” due to collinearity with small-for-gestational age.

<sup>h</sup>A total of 9 data points missing (n=381).
